# Supplementary material
Source: ML conference proceedings conference paper supplement (https://openreview.net/forum?id=Rn8u4MYgeNJ)

SVHN

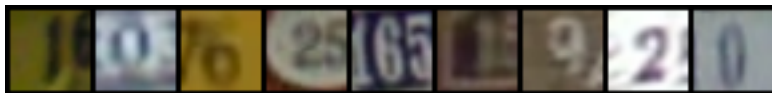

MNIST

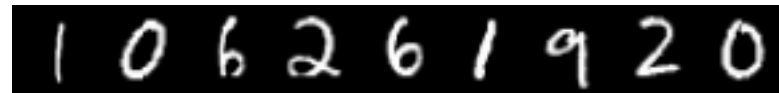

-&gt;MNIST

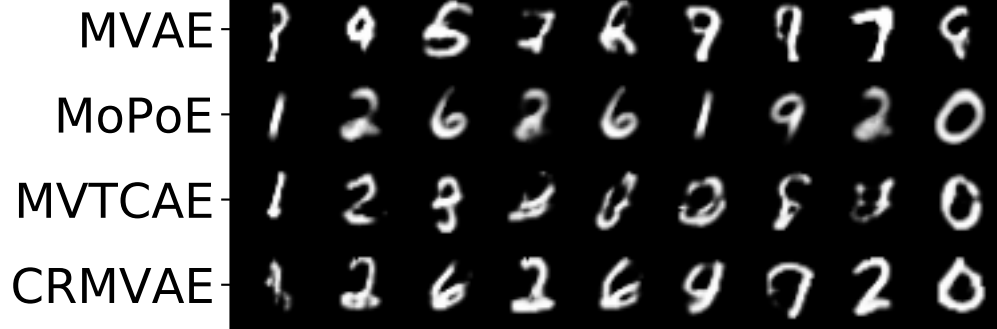

-&gt;SVHN

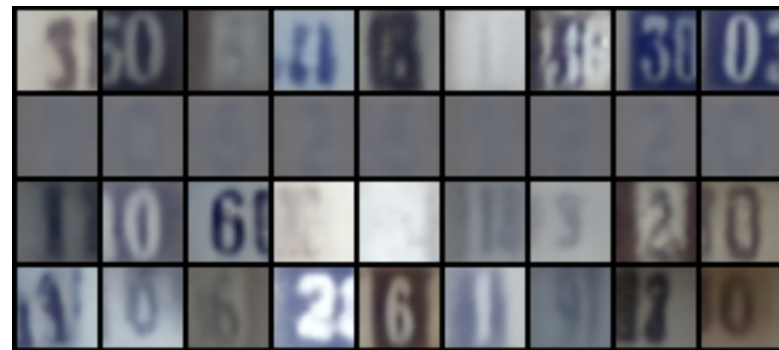

Supplement: supplementary_material [file attachment]
